# Supplementary material for: Responses to Enteric Motor Neurons in the Gastric Fundus of Mice With Reduced Intramuscular Interstitial Cells of Cajal
Source: PubMed Central journal article supplement — J Neurogastroenterol Motil. 2014 Apr;20(2):171–84. doi: 10.5056/jnm.2014.20.2.171 (PMC4015192; doi:10.5056/jnm.2014.20.2.171), 2014-04
Supplement: JNM-20-171_Suppl.pdf [file JNM-20-171_Suppl.pdf]

**Supplementary Table 1.** Summary Analysis of the Contraction Component (AUC, Peak) of the Electrical Field Stimulation Induced Mechanical Response From Control and  $W/W^V$  Fundus Tissues Under No Drugs Added and in the Presence of Atropine

| Hz | Control<br>(No-drugs, n = 16) |             | $W/W^V$ group 1<br>(No-drugs, n = 14) |                 |             |                 | $W/W^V$ group 2<br>(No-drugs, n = 12) |                 |             |                 |
|----|-------------------------------|-------------|---------------------------------------|-----------------|-------------|-----------------|---------------------------------------|-----------------|-------------|-----------------|
|    | AUC                           | Peak        | AUC                                   |                 | Peak        |                 | AUC                                   |                 | Peak        |                 |
|    | Mean                          | Mean        | Mean                                  | <i>P</i> -value | Mean        | <i>P</i> -value | Mean                                  | <i>P</i> -value | Mean        | <i>P</i> -value |
| 1  | 0.31 ± 0.03                   | 0.40 ± 0.04 | 1.40 ± 0.13                           | *               | 0.27 ± 0.03 | NS              | 3.71 ± 0.71                           | ***<br>###      | 1.03 ± 0.18 | ***<br>###      |
| 2  | 0.45 ± 0.04                   | 0.41 ± 0.05 | 2.12 ± 0.27                           | **              | 0.47 ± 0.04 | NS              | 5.08 ± 0.79                           | ***<br>###      | 1.40 ± 0.18 | ***<br>###      |
| 4  | 0.54 ± 0.10                   | 0.46 ± 0.06 | 3.51 ± 0.44                           | **              | 0.78 ± 0.07 | NS              | 6.43 ± 1.31                           | ***<br>##       | 1.69 ± 0.25 | ***<br>###      |
| 8  | 1.04 ± 0.16                   | 0.83 ± 0.28 | 8.16 ± 1.15                           | ***             | 1.62 ± 0.23 | NS              | 8.89 ± 2.23                           | ***<br>NS       | 2.45 ± 0.37 | **<br>NS        |
| 16 | 2.71 ± 0.31                   | 1.64 ± 0.23 | 14.09 ± 2.10                          | ***             | 2.68 ± 0.42 | NS              | 12.30 ± 3.33                          | **<br>NS        | 3.32 ± 0.54 | *<br>NS         |
| 32 | 10.13 ± 0.67                  | 3.60 ± 0.61 | 27.29 ± 2.34                          | ***             | 5.21 ± 0.29 | NS              | 20.19 ± 5.01                          | *<br>NS         | 5.17 ± 0.71 | NS<br>NS        |

  

| Hz | Control<br>(Atropine, n = 8) |             | $W/W^V$ group 1<br>(Atropine, n = 7) |                 |             |                 | $W/W^V$ group 2<br>(Atropine, n = 6) |                 |             |                 |
|----|------------------------------|-------------|--------------------------------------|-----------------|-------------|-----------------|--------------------------------------|-----------------|-------------|-----------------|
|    | AUC                          | Peak        | AUC                                  |                 | Peak        |                 | AUC                                  |                 | Peak        |                 |
|    | Mean                         | Mean        | Mean                                 | <i>P</i> -value | Mean        | <i>P</i> -value | Mean                                 | <i>P</i> -value | Mean        | <i>P</i> -value |
| 1  | 0.00 ± 0.00                  | 0.00 ± 0.00 | 0.00 ± 0.00                          | NS              | 0.00 ± 0.00 | NS              | 0.28 ± 0.15                          | *<br>#          | 0.17 ± 0.09 | *<br>#          |
| 2  | 0.00 ± 0.00                  | 0.00 ± 0.00 | 0.00 ± 0.00                          | NS              | 0.00 ± 0.00 | NS              | 1.39 ± 0.84                          | NS<br>NS        | 0.49 ± 0.23 | *<br>##         |
| 4  | 0.00 ± 0.00                  | 0.00 ± 0.00 | 0.27 ± 0.02                          | *               | 0.14 ± 0.02 | *               | 0.42 ± 0.15                          | **<br>NS        | 0.29 ± 0.07 | ***<br>#        |
| 8  | 0.00 ± 0.00                  | 0.00 ± 0.00 | 0.27 ± 0.06                          | **              | 0.13 ± 0.01 | **              | 0.08 ± 0.07                          | NS<br>#         | 0.08 ± 0.05 | *<br>NS         |
| 16 | 0.00 ± 0.00                  | 0.00 ± 0.00 | 0.29 ± 0.06                          | ***             | 0.14 ± 0.02 | ***             | 0.05 ± 0.01                          | NS<br>###       | 0.09 ± 0.01 | ***<br>#        |
| 32 | 0.02 ± 0.01                  | 0.03 ± 0.02 | 0.36 ± 0.14                          | *               | 0.14 ± 0.04 | **              | 0.15 ± 0.02                          | NS<br>NS        | 0.21 ± 0.01 | ***<br>NS       |

AUC, area under the curve.

“n” represent number of animals, *P*-values indicated as not significant (NS), \**P* < 0.05, \*\**P* < 0.01 and \*\*\**P* < 0.001. Control vs.  $W/W^V$  group 1, control vs.  $W/W^V$  group 2 (top) and  $W/W^V$  group 1 vs.  $W/W^V$  group 2 (bottom; each *P*-value represented by #).

**Supplementary Table 2.** Summary Analysis of the Contraction Component (AUC, Peak) of the Electrical Field Stimulation Induced Mechanical Response From Control and  $W/W^V$  Fundus Tissues in the Presence of L-NNA, Atropine and L-NNA Together

| Hz | Control<br>(L-NNA, n = 8) |              | $W/W^V$ group 1<br>(L-NNA, n = 7) |                 |             |                 | $W/W^V$ group 2<br>(L-NNA, n = 6) |                 |              |                 |
|----|---------------------------|--------------|-----------------------------------|-----------------|-------------|-----------------|-----------------------------------|-----------------|--------------|-----------------|
|    | AUC                       |              | AUC                               |                 | Peak        |                 | AUC                               |                 | Peak         |                 |
|    | Mean                      | Mean         | Mean                              | <i>P</i> -value | Mean        | <i>P</i> -value | Mean                              | <i>P</i> -value | Mean         | <i>P</i> -value |
| 1  | 3.41 ± 0.81               | 0.73 ± 0.06  | 0.8 ± 0.1                         | *               | 0.08 ± 0.03 | ***             | 1.30 ± 0.37                       | NS              | 0.41 ± 0.09  | **              |
|    |                           |              |                                   |                 |             |                 |                                   | NS              |              | ##              |
| 2  | 8.36 ± 2.2                | 1.23 ± 0.13  | 1.13 ± 0.67                       | *               | 0.21 ± 0.08 | ***             | 2.74 ± 0.79                       | NS              | 0.62 ± 0.13  | **              |
|    |                           |              |                                   |                 |             |                 |                                   | NS              |              | NS              |
| 4  | 13.63 ± 3.1               | 2.35 ± 0.22  | 3.21 ± 0.93                       | *               | 0.48 ± 0.1  | ***             | 8.35 ± 2.61                       | NS              | 1.74 ± 0.26  | NS              |
|    |                           |              |                                   |                 |             |                 |                                   | NS              |              | ##              |
| 8  | 32.85 ± 6.2               | 5.88 ± 0.64  | 10.63 ± 2.32                      | *               | 1.66 ± 0.41 | ***             | 24.30 ± 5.83                      | NS              | 4.90 ± 0.46  | NS              |
|    |                           |              |                                   |                 |             |                 |                                   | NS              |              | ##              |
| 16 | 53.96 ± 6.73              | 9.96 ± 1.01  | 19.53 ± 2.67                      | **              | 3.72 ± 1.1  | ***             | 47.31 ± 6.22                      | NS              | 9.56 ± 0.46  | NS              |
|    |                           |              |                                   |                 |             |                 |                                   | #               |              | ##              |
| 32 | 84.25 ± 7.64              | 16.50 ± 1.64 | 50.94 ± 4.94                      | **              | 7.42 ± 1.31 | ***             | 103.39 ± 5.60                     | NS              | 18.11 ± 1.53 | NS              |
|    |                           |              |                                   |                 |             |                 |                                   | ###             |              | ##              |

  

| Hz | Control<br>(Atropine and L-NNA, n = 16) |             | $W/W^V$ group 1<br>(Atropine and L-NNA, n = 14) |                 |             |                 | $W/W^V$ group 2<br>(Atropine and L-NNA, n = 12) |                 |             |                 |
|----|-----------------------------------------|-------------|-------------------------------------------------|-----------------|-------------|-----------------|-------------------------------------------------|-----------------|-------------|-----------------|
|    | AUC                                     |             | AUC                                             |                 | Peak        |                 | AUC                                             |                 | Peak        |                 |
|    | Mean                                    | Mean        | Mean                                            | <i>P</i> -value | Mean        | <i>P</i> -value | Mean                                            | <i>P</i> -value | Mean        | <i>P</i> -value |
| 1  | 0.00 ± 0.00                             | 0.00 ± 0.00 | 0.00 ± 0.00                                     | NS              | 0.00 ± 0.00 | NS              | 0.00 ± 0.00                                     | NS              | 0.00 ± 0.00 | NS              |
| 2  | 0.00 ± 0.00                             | 0.00 ± 0.00 | 0.00 ± 0.00                                     | NS              | 0.00 ± 0.00 | NS              | 0.00 ± 0.00                                     | NS              | 0.00 ± 0.00 | NS              |
| 4  | 0.00 ± 0.00                             | 0.00 ± 0.00 | 0.00 ± 0.00                                     | NS              | 0.00 ± 0.00 | NS              | 0.00 ± 0.00                                     | NS              | 0.00 ± 0.00 | NS              |
| 8  | 0.14 ± 0.07                             | 0.06 ± 0.03 | 0.24 ± 0.10                                     | NS              | 0.08 ± 0.03 | NS              | 1.19 ± 0.69                                     | NS              | 0.10 ± 0.05 | NS              |
|    |                                         |             |                                                 |                 |             |                 |                                                 | NS              |             | NS              |
| 16 | 1.33 ± 0.38                             | 0.28 ± 0.06 | 2.62 ± 0.77                                     | NS              | 0.42 ± 0.15 | NS              | 12.03 ± 1.79                                    | ***             | 0.49 ± 0.08 | NS              |
|    |                                         |             |                                                 |                 |             |                 |                                                 | ###             |             | NS              |
| 32 | 4.32 ± 1.08                             | 0.99 ± 0.19 | 13.42 ± 1.44                                    | **              | 1.68 ± 0.6  | NS              | 21.52 ± 3.77                                    | ***             | 0.97 ± 0.15 | NS              |
|    |                                         |             |                                                 |                 |             |                 |                                                 | #               |             | NS              |

L-NNA, *N*<sup>ω</sup>-nitro-L-arginine; AUC, area under the curve.

“n” represent number of animals, *P*-values indicated as not significant (NS), \**P* < 0.05, \*\**P* < 0.01 and \*\*\**P* < 0.001. Control vs.  $W/W^V$  group 1, Control vs.  $W/W^V$  group 2 (top) and  $W/W^V$  group 1 vs.  $W/W^V$  group 2 (bottom; each *P*-value represented by #).

**Supplementary Table 3.** Summary Analysis of the Relaxation Component (AUC, Peak) of the Electrical Field Stimulation Induced Mechanical Response From Control and  $W/W^V$  Fundus Tissues No Drugs Added and in the Presence of Atropine

| Hz | Control<br>(No-drugs, n = 16) |             | $W/W^V$ group 2<br>(No-drugs, n = 12) |                 |             |                 |
|----|-------------------------------|-------------|---------------------------------------|-----------------|-------------|-----------------|
|    | AUC                           | Peak        | AUC                                   |                 | Peak        |                 |
|    | Mean                          | Mean        | Mean                                  | <i>P</i> -value | Mean        | <i>P</i> -value |
| 1  | 0.05 ± 0.03                   | 0.07 ± 0.03 | 0.00 ± 0.00                           | NS              | 0.00 ± 0.00 | *<br>NS         |
| 2  | 2.09 ± 0.47                   | 0.52 ± 0.09 | 0.53 ± 0.34                           | **<br>NS        | 0.06 ± 0.04 | ***<br>NS       |
| 4  | 12.62 ± 1.21                  | 1.01 ± 0.12 | 7.17 ± 1.60                           | **<br>###       | 0.43 ± 0.08 | ***<br>##       |
| 8  | 29.20 ± 2.49                  | 1.79 ± 0.18 | 19.62 ± 1.86                          | **<br>###       | 0.99 ± 0.12 | ***<br>###      |
| 16 | 47.30 ± 3.08                  | 2.40 ± 0.21 | 35.02 ± 3.63                          | **<br>###       | 1.57 ± 0.23 | **<br>###       |
| 32 | 88.92 ± 8.78                  | 2.93 ± 0.28 | 66.50 ± 9.74                          | *<br>###        | 2.26 ± 0.35 | NS<br>###       |

  

| Hz | Control<br>(Atropine, n = 8) |             | $W/W^V$ group 2<br>(Atropine, n = 6) |                 |             |                 |
|----|------------------------------|-------------|--------------------------------------|-----------------|-------------|-----------------|
|    | AUC                          | Peak        | AUC                                  |                 | Peak        |                 |
|    | Mean                         | Mean        | Mean                                 | <i>P</i> -value | Mean        | <i>P</i> -value |
| 1  | 0.73 ± 0.13                  | 0.28 ± 0.04 | 0.00 ± 0.00                          | ***<br>NS       | 0.00 ± 0.00 | ***<br>NS       |
| 2  | 3.98 ± 0.76                  | 0.52 ± 0.07 | 0.65 ± 0.35                          | ***<br>NS       | 0.09 ± 0.05 | ***<br>NS       |
| 4  | 18.08 ± 2.33                 | 0.96 ± 0.10 | 9.44 ± 3.10                          | *<br>#          | 0.41 ± 0.11 | ***<br>##       |
| 8  | 45.84 ± 6.50                 | 2.03 ± 0.14 | 24.80 ± 5.69                         | *<br>##         | 1.30 ± 0.31 | *<br>###        |
| 16 | 64.44 ± 6.40                 | 2.61 ± 0.20 | 37.24 ± 7.65                         | **<br>###       | 1.73 ± 0.35 | *<br>###        |
| 32 | 121.55 ± 11.40               | 3.22 ± 0.23 | 84.93 ± 15.6                         | *<br>###        | 2.45 ± 0.54 | NS<br>###       |

AUC, area under the curve.

“n” represent number of animals, *P*-values indicated as not significant (NS), \**P* < 0.05, \*\**P* < 0.01 and \*\*\**P* < 0.001. Control vs.  $W/W^V$  group 2 (top) and  $W/W^V$  group 1 vs.  $W/W^V$  group 2 (bottom; each *P*-value represented by #).

**Supplementary Table 4.** Summary Analysis of the Relaxation Component (AUC, Peak) of the Electrical Field Stimulation Induced Mechanical Response From Control and  $W/W^V$  Fundus Tissues in the Presence of L-NNA, Atropine and L-NNA Together

| Hz | Control<br>(L-NNA, n = 8) |             | $W/W^V$ group 2<br>(L-NNA, n = 6) |                 |             |                 |
|----|---------------------------|-------------|-----------------------------------|-----------------|-------------|-----------------|
|    | AUC                       | Peak        | AUC                               |                 | Peak        |                 |
|    | Mean                      | Mean        | Mean                              | <i>P</i> -value | Mean        | <i>P</i> -value |
| 1  | 0.00 ± 0.00               | 0.00 ± 0.00 | 0.00 ± 0.00                       | NS              | 0.00 ± 0.00 | NS              |
| 2  | 0.00 ± 0.00               | 0.00 ± 0.00 | 0.00 ± 0.00                       | NS              | 0.00 ± 0.00 | NS              |
| 4  | 0.00 ± 0.00               | 0.00 ± 0.00 | 0.00 ± 0.00                       | NS              | 0.00 ± 0.00 | NS              |
| 8  | 0.00 ± 0.00               | 0.00 ± 0.00 | 0.00 ± 0.00                       | NS              | 0.00 ± 0.00 | NS              |
| 16 | 0.00 ± 0.00               | 0.00 ± 0.00 | 0.00 ± 0.00                       | NS              | 0.00 ± 0.00 | NS              |
| 32 | 7.39 ± 0.8                | 1.00 ± 0.15 | 0.00 ± 0.00                       | ***             | 0.00 ± 0.00 | ***             |
|    |                           |             |                                   | NS              |             | NS              |

  

| Hz | Control<br>(Atropine and L-NNA, n = 16) |             | $W/W^V$ group 2<br>(Atropine and L-NNA, n = 12) |                 |             |                 |
|----|-----------------------------------------|-------------|-------------------------------------------------|-----------------|-------------|-----------------|
|    | AUC                                     | Peak        | AUC                                             |                 | Peak        |                 |
|    | Mean                                    | Mean        | Mean                                            | <i>P</i> -value | Mean        | <i>P</i> -value |
| 1  | 0.00 ± 0.00                             | 0.00 ± 0.00 | 0.00 ± 0.00                                     | NS              | 0.00 ± 0.00 | NS              |
| 2  | 0.00 ± 0.00                             | 0.00 ± 0.00 | 0.00 ± 0.00                                     | NS              | 0.00 ± 0.00 | NS              |
| 4  | 0.02 ± 0.01                             | 0.03 ± 0.02 | 0.00 ± 0.00                                     | NS              | 0.00 ± 0.00 | NS              |
| 8  | 0.03 ± 0.02                             | 0.03 ± 0.02 | 0.00 ± 0.00                                     | NS              | 0.00 ± 0.00 | NS              |
| 16 | 0.04 ± 0.03                             | 0.04 ± 0.03 | 0.00 ± 0.00                                     | NS              | 0.00 ± 0.00 | NS              |
| 32 | 7.76 ± 3.00                             | 0.34 ± 0.13 | 0.00 ± 0.00                                     | **              | 0.00 ± 0.00 | **              |
|    |                                         |             |                                                 | NS              |             | NS              |

L-NNA,  $N^{\omega}$ -nitro-L-arginine; AUC, area under the curve.

“n” represent number of animals, *P*-values indicated as not significant (NS), \**P* < 0.05, \*\**P* < 0.01 and \*\*\**P* < 0.001. Control vs.  $W/W^V$  group 2.

**Supplementary Table 5.** Summary Analysis of the Contraction Component (AUC, Peak) of the Electrical Field Stimulation Induced Mechanical Response From Control and  $W/W^V$  Fundus Tissues in the Presence of L-NNA Before Neostigmine

| Hz | Control<br>(No-drugs, n = 6) |             | $W/W^V$<br>(No-drugs, n = 6) |                 |             |                 |
|----|------------------------------|-------------|------------------------------|-----------------|-------------|-----------------|
|    | AUC                          | Peak        | AUC                          |                 | Peak        |                 |
|    | Mean                         | Mean        | Mean                         | <i>P</i> -value | Mean        | <i>P</i> -value |
| 1  | 1.07 ± 0.21                  | 0.56 ± 0.08 | 3.90 ± 1.16                  | *               | 1.11 ± 0.23 | *               |
| 2  | 1.04 ± 0.17                  | 0.54 ± 0.07 | 5.30 ± 1.67                  | *               | 1.48 ± 0.36 | *               |
| 4  | 1.32 ± 0.25                  | 0.75 ± 0.10 | 5.99 ± 2.07                  | *               | 1.69 ± 0.37 | *               |
| 8  | 3.49 ± 0.59                  | 1.80 ± 0.25 | 8.59 ± 2.29                  | *               | 3.15 ± 0.71 | NS              |
| 16 | 9.27 ± 1.08                  | 3.20 ± 0.56 | 14.85 ± 2.09                 | *               | 4.08 ± 1.01 | NS              |
| 32 | 24.86 ± 1.99                 | 7.26 ± 1.12 | 34.38 ± 3.29                 | *               | 9.72 ± 1.44 | NS              |

  

| Hz | Control<br>(L-NNA, n = 6) |              | $W/W^V$<br>(L-NNA, n = 6) |                 |              |                 |
|----|---------------------------|--------------|---------------------------|-----------------|--------------|-----------------|
|    | AUC                       | Peak         | AUC                       |                 | Peak         |                 |
|    | Mean                      | Mean         | Mean                      | <i>P</i> -value | Mean         | <i>P</i> -value |
| 1  | 4.06 ± 0.84               | 1.29 ± 0.22  | 1.17 ± 0.64               | *               | 0.32 ± 0.08  | **              |
| 2  | 5.95 ± 0.91               | 1.48 ± 0.20  | 3.12 ± 0.80               | *               | 0.58 ± 0.13  | **              |
| 4  | 21.2 ± 3.64               | 3.19 ± 0.42  | 7.52 ± 1.75               | **              | 1.53 ± 0.20  | **              |
| 8  | 33.50 ± 4.83              | 8.22 ± 0.96  | 20.19 ± 3.23              | *               | 4.38 ± 0.32  | **              |
| 16 | 64.38 ± 7.33              | 14.40 ± 1.53 | 44.49 ± 4.19              | *               | 8.02 ± 0.45  | **              |
| 32 | 101.5 ± 20.07             | 21.13 ± 2.60 | 94.65 ± 14.2              | NS              | 15.41 ± 0.99 | NS              |

AUC, area under the curve; L-NNA, *N*<sup>ω</sup>-nitro-l-arginine.

“n” represent number of animals, *P*-values indicated as not significant (NS), \**P* < 0.05 and \*\**P* < 0.01. Control vs.  $W/W^V$ .

**Supplementary Table 6.** Summary Analysis of the Contraction Component (AUC, Peak) of the Electrical Field Stimulation Induced Mechanical Response From Control and  $W/W^V$  Fundus Tissues in the Presence of Neostigmine

| Hz | Control<br>(Neostigmine, n = 6) |              | $W/W^V$<br>(Neostigmine, n = 6) |                 |              |                 |
|----|---------------------------------|--------------|---------------------------------|-----------------|--------------|-----------------|
|    | AUC                             | Peak         | AUC                             |                 | Peak         |                 |
|    | Mean                            | Mean         | Mean                            | <i>P</i> -value | Mean         | <i>P</i> -value |
| 1  | 204.20 ± 7.38                   | 12.18 ± 0.43 | 304.70 ± 31.00                  | **              | 21.52 ± 1.86 | ***             |
| 2  | 327.60 ± 9.33                   | 16.75 ± 0.39 | 434.70 ± 41.50                  | *               | 25.77 ± 2.36 | ***             |
| 4  | 615.80 ± 55.30                  | 21.16 ± 0.85 | 915.20 ± 116.20                 | *               | 31.94 ± 2.99 | ***             |
| 8  | 910.40 ± 67.40                  | 31.09 ± 1.67 | 1308.80 ± 126.90                | **              | 39.88 ± 3.24 | *               |
| 16 | 1365.70 ± 57.90                 | 35.18 ± 1.17 | 1739.30 ± 200.60                | **              | 42.55 ± 3.03 | *               |
| 32 | 1419.00 ± 35.60                 | 36.49 ± 1.44 | 2471.10 ± 323.10                | ***             | 45.51 ± 3.46 | *               |

  

| Hz | Control<br>(Neostigmine and Atropine, n = 6) |             | $W/W^V$<br>(Neostigmine and Atropine, n = 6) |                 |             |                 |
|----|----------------------------------------------|-------------|----------------------------------------------|-----------------|-------------|-----------------|
|    | AUC                                          | Peak        | AUC                                          |                 | Peak        |                 |
|    | Mean                                         | Mean        | Mean                                         | <i>P</i> -value | Mean        | <i>P</i> -value |
| 1  | 0                                            | 0           | 0                                            | NS              | 0           | NS              |
| 2  | 0                                            | 0           | 0                                            | NS              | 0           | NS              |
| 4  | 0                                            | 0           | 0                                            | NS              | 0           | NS              |
| 8  | 0                                            | 0           | 0.44 ± 0.18                                  | *               | 0.06 ± 0.01 | ***             |
| 16 | 2.12 ± 1.65                                  | 0.38 ± 0.38 | 1.01 ± 0.47                                  | NS              | 0.12 ± 0.03 | NS              |
| 32 | 10.32 ± 4.37                                 | 1.33 ± 0.59 | 4.42 ± 1.44                                  | NS              | 0.26 ± 0.06 | NS              |

AUC, area under the curve.

“n” represent number of animals, *P*-values indicated as not significant (NS), \**P* < 0.05, \*\**P* < 0.01 and \*\*\**P* < 0.001. Control vs.  $W/W^V$ .
